# Supplementary material for: Pyridoxal-based low molecular weight progelator as a new chemosensor for the recognition of Ag+ and Hg2+ under different conditions
Source: Royal Society of Chemistry journal article supplement (doi:10.1039/d2ma00358a), 2022-01-01
Supplement: d2ma00358a1.pdf [file d2ma00358a1.pdf]

## Pyridoxal-based low molecular weight pro-gelator as a new chemosensor for recognition of Ag<sup>+</sup> and Hg<sup>2+</sup> under different conditions

Saswati Ghosh Roy<sup>a</sup>, Abhishek Kumar<sup>b</sup>, Neeraj Misra<sup>b</sup> and Kumaresh Ghosh<sup>\*a</sup>

<sup>a</sup>Department of Chemistry, University of Kalyani, Kalyani-741235, Email: [ghosh\\_k2003@yahoo.co.in](mailto:ghosh_k2003@yahoo.co.in),  
[kumareshchem18@klyuniv.ac.in](mailto:kumareshchem18@klyuniv.ac.in)

<sup>b</sup>Department of Physics, University of Lucknow, Lucknow-226007, India

**Table S1.** Results of gelation test of compounds **1** and **2** alone and in presence of metal ions

| Solvents                                                     | Compound 1       | Compound 2 |
|--------------------------------------------------------------|------------------|------------|
| Toluene                                                      | S                | S          |
| Benzene                                                      | S                | S          |
| 1,2 dichloro benzene                                         | S                | S          |
| Petether                                                     | S                | S          |
| Ethylacetate                                                 | S                | S          |
| Acetonitrile                                                 | S                | S          |
| THF                                                          | S                | S          |
| Dioxane                                                      | S                | S          |
| DMSO                                                         | S                | S          |
| DMF                                                          | S                | S          |
| Methanol                                                     | S                | S          |
| Dioxane + H <sub>2</sub> O (1:1, v/v)                        | P                | P          |
| DMF + H <sub>2</sub> O (1:1, v/v)                            | P                | P          |
| DMSO+ H <sub>2</sub> O (1:1, v/v)                            | P                | P          |
| Methanol + H <sub>2</sub> O (1:1, v/v)                       | P                | P          |
| Acetonitrile + H <sub>2</sub> O (1:1, v/v)                   | P                | P          |
| Dioxane + H <sub>2</sub> O + Ag <sup>+</sup> (1:1, v/v)      | G                | P          |
| DMF + H <sub>2</sub> O + Ag <sup>+</sup> (1:1, v/v)          | G                | P          |
| DMSO+ H <sub>2</sub> O + Ag <sup>+</sup> (1:1, v/v)          | G                | P          |
| Methanol + H <sub>2</sub> O + Ag <sup>+</sup> (1:1, v/v)     | P                | P          |
| Acetonitrile + H <sub>2</sub> O + Ag <sup>+</sup> (1:1, v/v) | Partial Gelation | P          |

S = Solution; G = Gel (mgc); P = Precipitation. Gelation tests were carried out at a concentration 10 mg/mL in different solvents. Gels were primarily characterized by inversion of vial method after ~5 min of sample preparation.

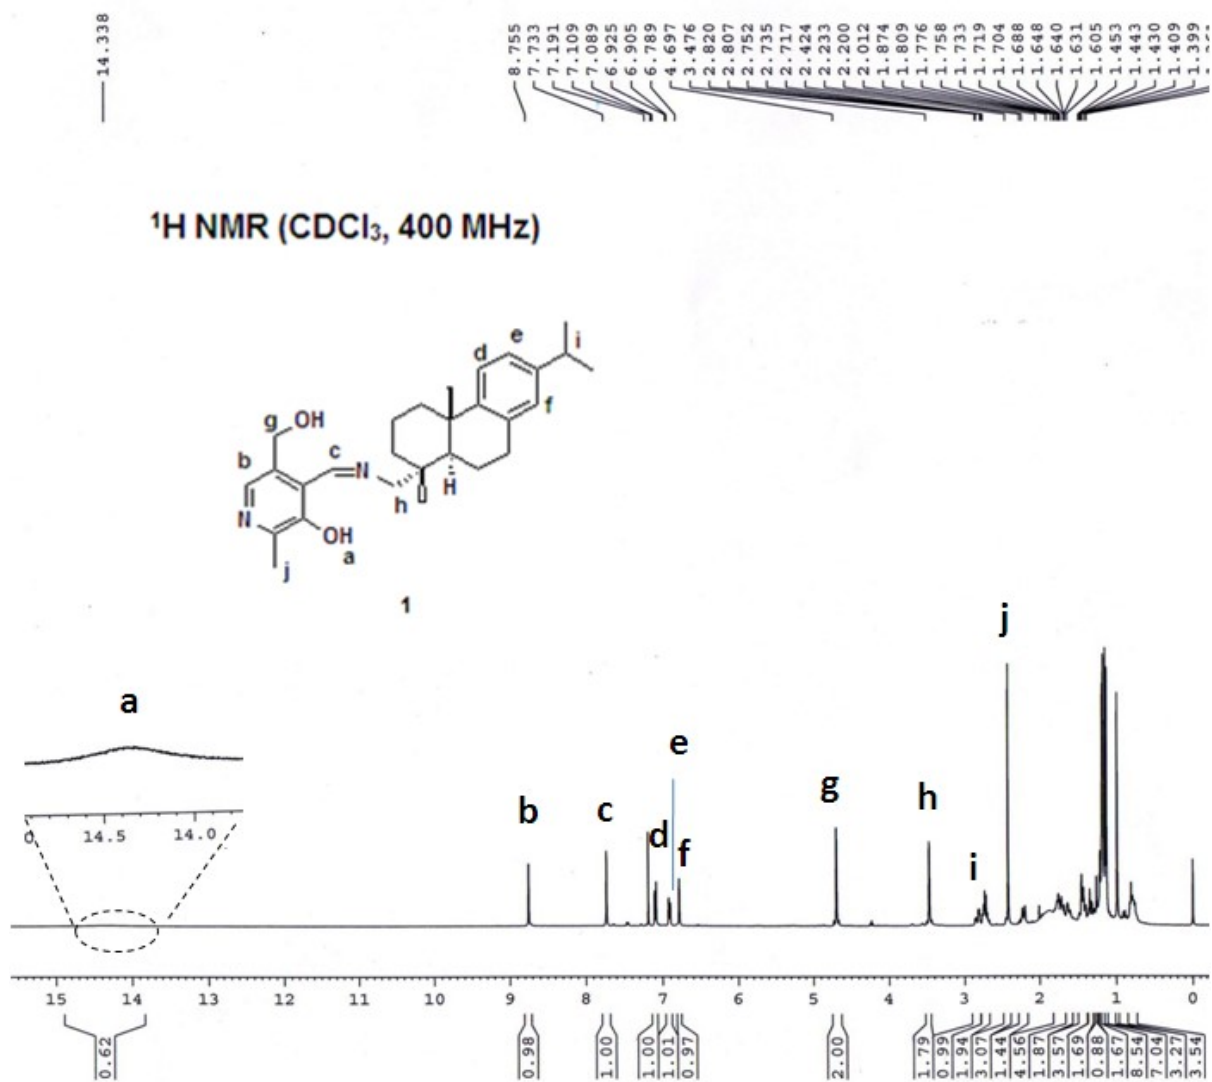

Figure S1. <sup>1</sup>H NMR spectrum of compound **1** in CDCl<sub>3</sub>.

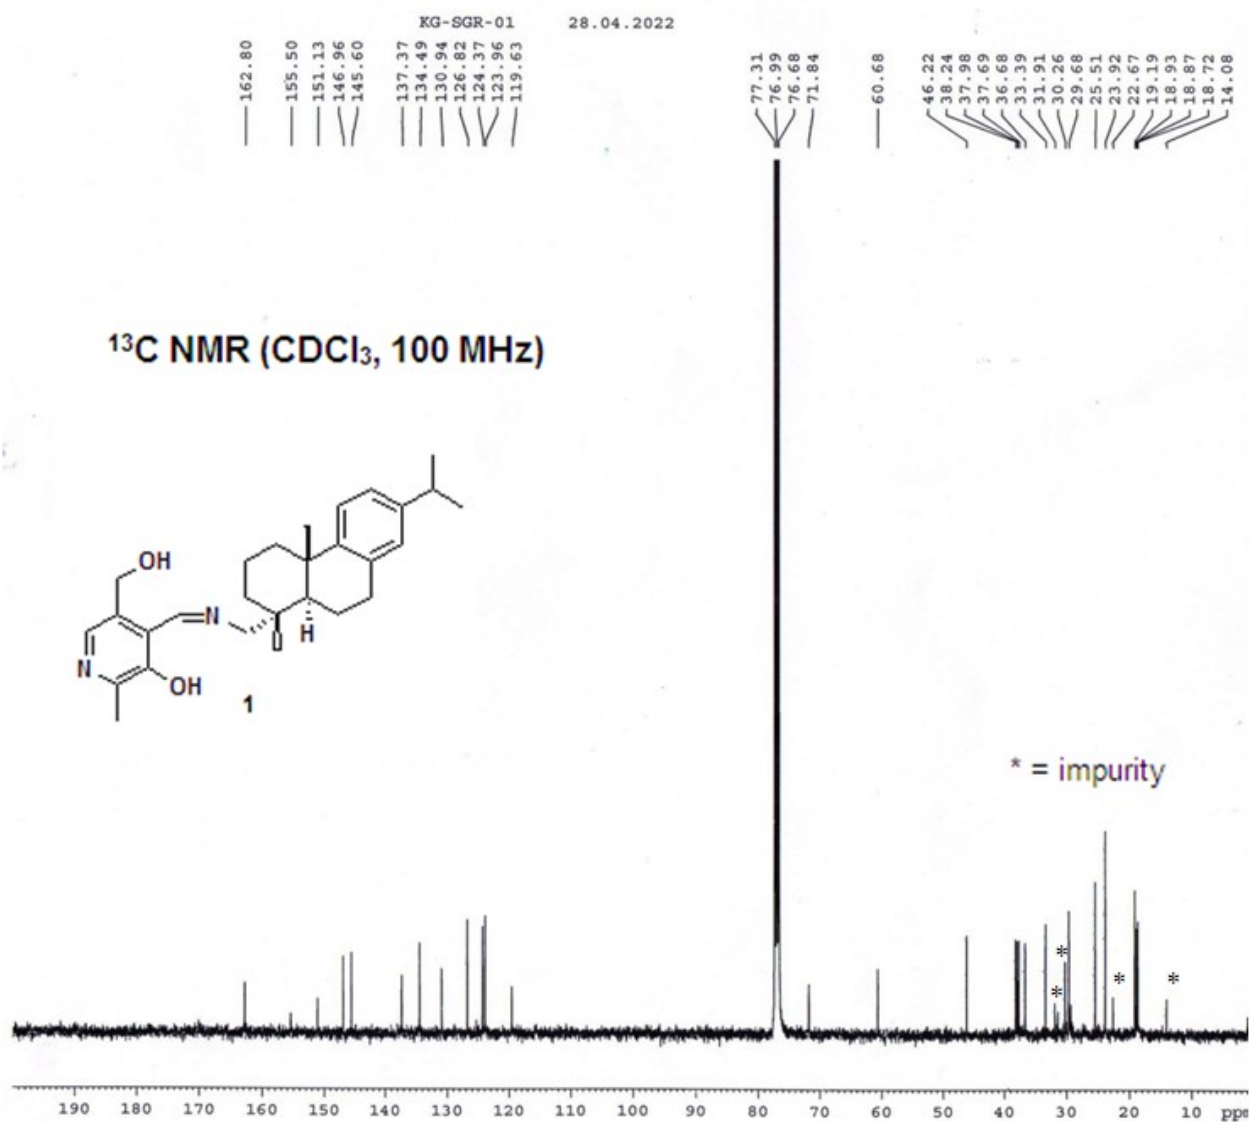

**Figure S2.**  $^{13}\text{C}$  NMR spectrum of compound **1** in CDCl<sub>3</sub>.

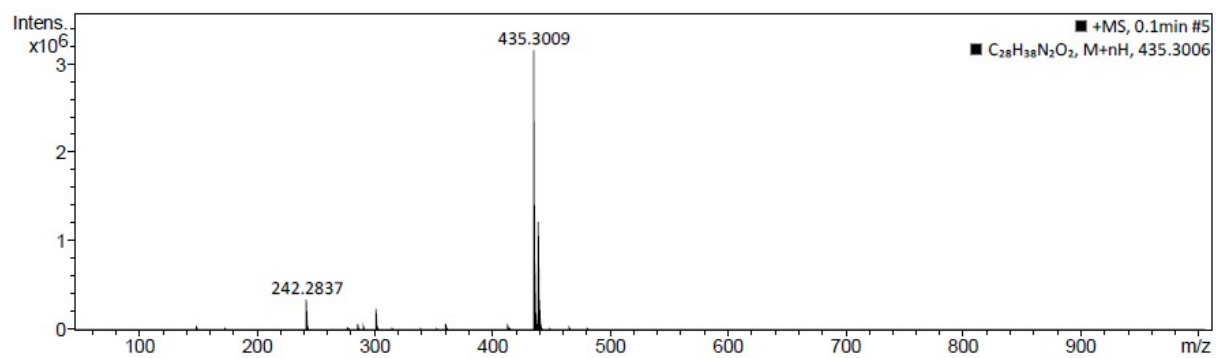

**Figure S3.**High resolution mass spectrum of compound **1**.Assignment of the main peak:  $m/z$  435.3009  $[M+H]^+$  (Calcd. 435.3012).

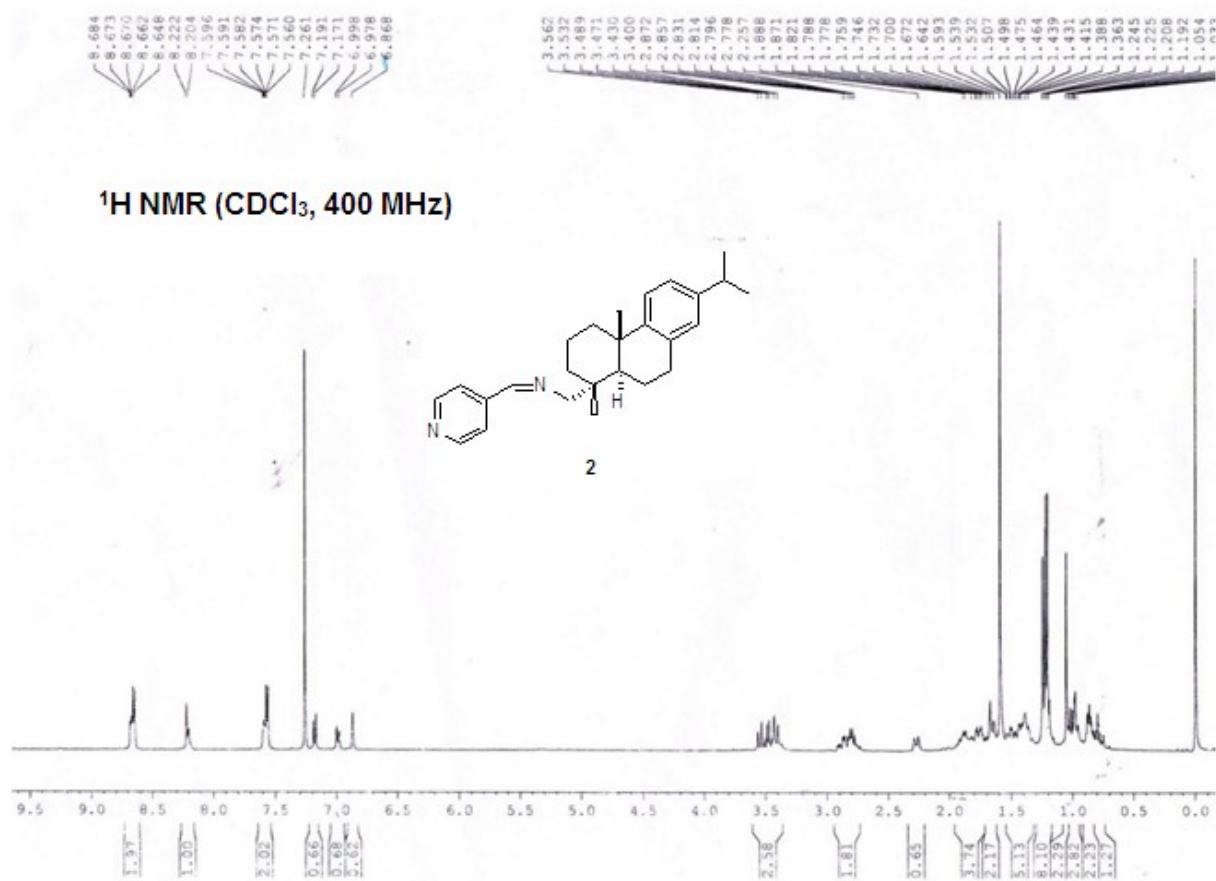

**Figure S4.** <sup>1</sup>H NMR spectrum of compound **2** in CDCl<sub>3</sub>.

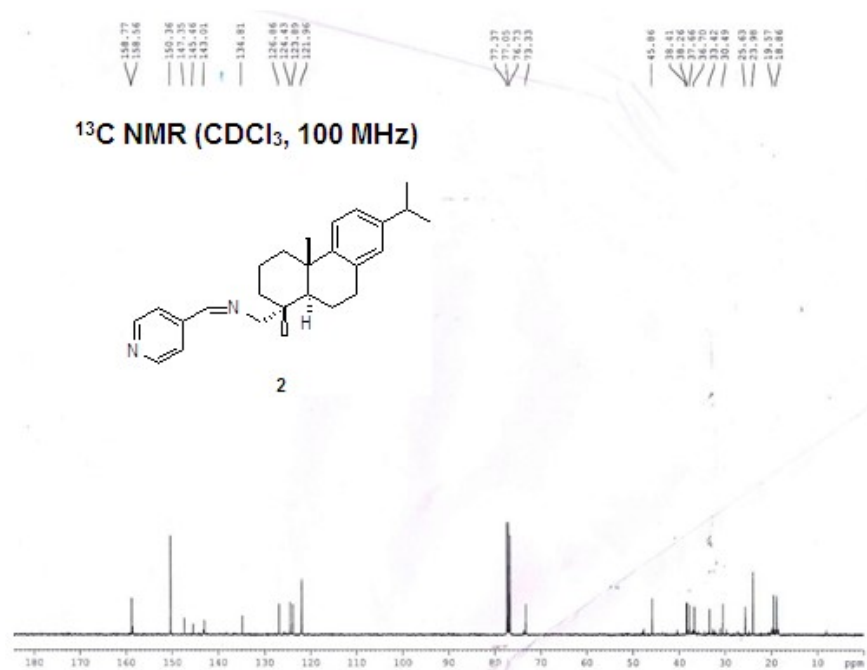

**Figure S5.** <sup>13</sup>C NMR spectrum of compound **2** in CDCl<sub>3</sub>.

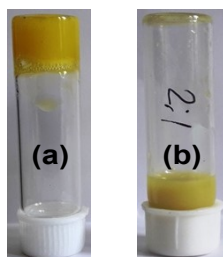

**Figure S6.** Gelation study of compound **1** (5 mg/mL) in DMSO-H<sub>2</sub>O (v/v, 1/1) in presence of AgNO<sub>3</sub>: (a) in presence of 1 equiv. of Ag<sup>+</sup> (**1** : Ag<sup>+</sup> = 1:2) and (b) 0.5 equiv. of Ag<sup>+</sup> ion (**1** : Ag<sup>+</sup> = 2:1).

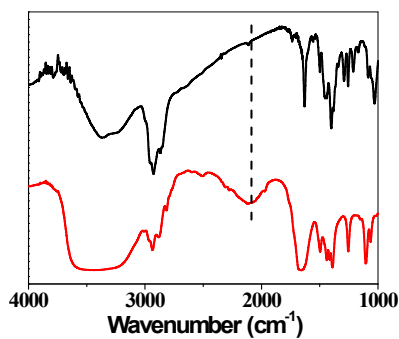

**Figure S7.** FT IR spectra of compound **1** in amorphous (black line) and gel state (red line).

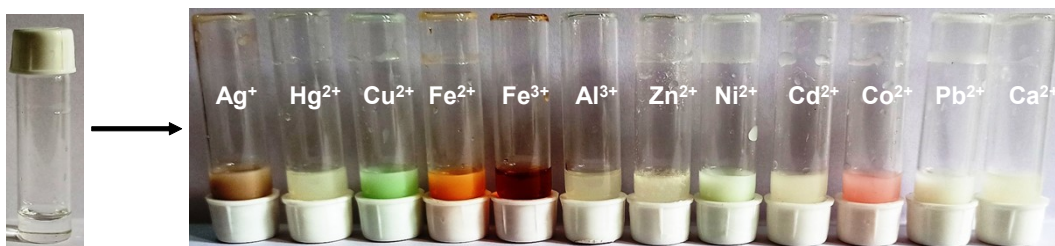

**Figure S8.** Photograph showing the interaction of **2** ( $c = 0.023$  mmol) upon addition of 1 equivalent amount of various metal analytes ( $c = 1 \times 10^{-3}$  mmol) in DMSO/H<sub>2</sub>O (1:1, v/v). All metal salts were taken as their nitrate salts (NO<sub>3</sub><sup>-</sup>), and Hg<sup>2+</sup>, Fe<sup>2+</sup> and Al<sup>3+</sup> were taken as their perchlorate salts (ClO<sub>4</sub><sup>-</sup>).

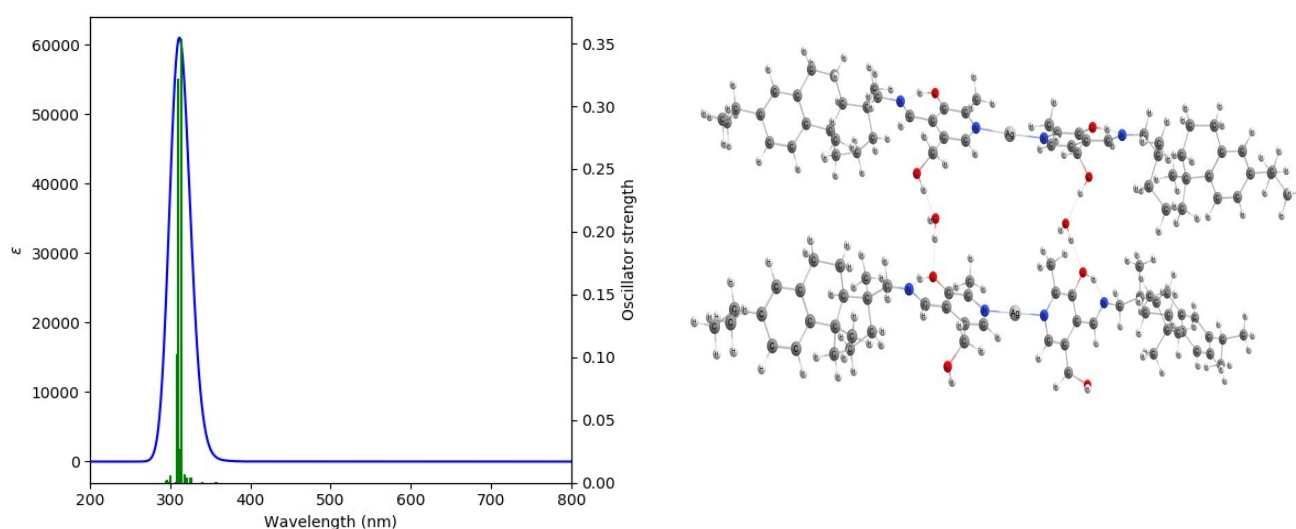

**Figure S9.** UV-Vis spectra of the aggregated form (shown at the right side) in DMSO-water.

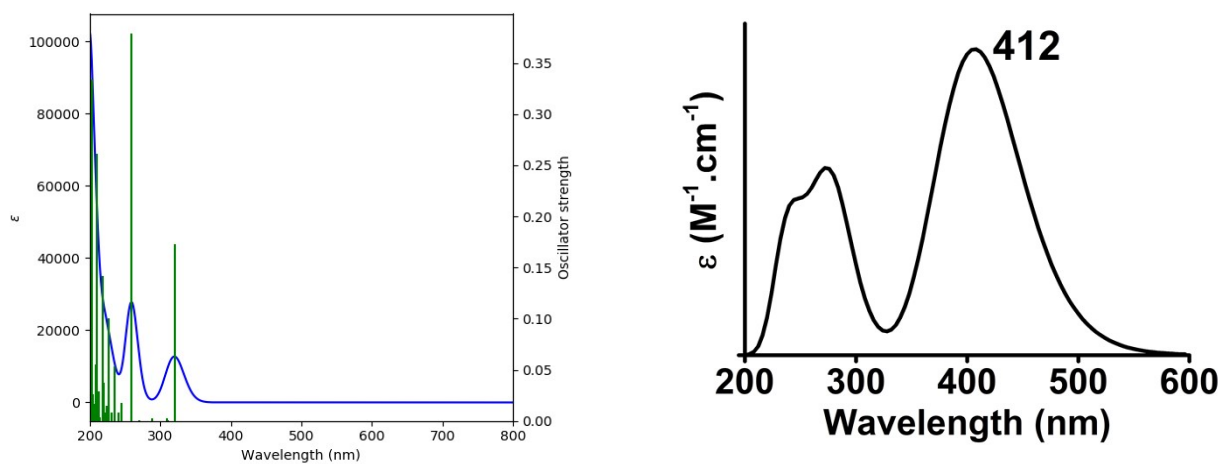

**Figure S10.** UV-Vis spectra of the form **1** (left) and its phenoxide form (right) in DMSO.

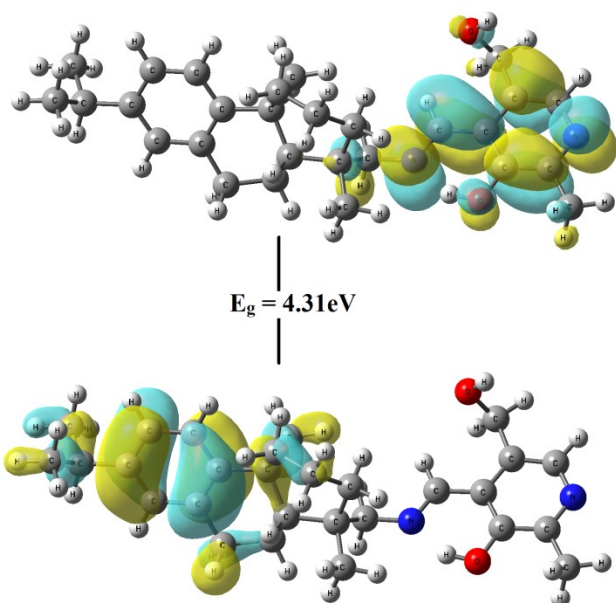

**Figure S11.** HOMO-LUMO plot of compound 1.

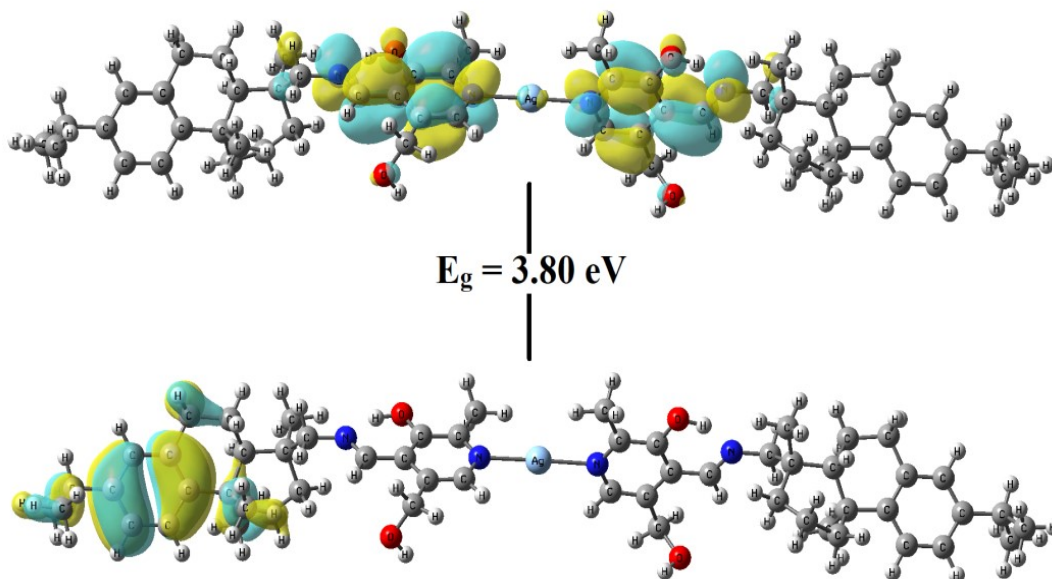

**Figure S12.** HOMO-LUMO plot of dimer of compound 1 with silver ion.



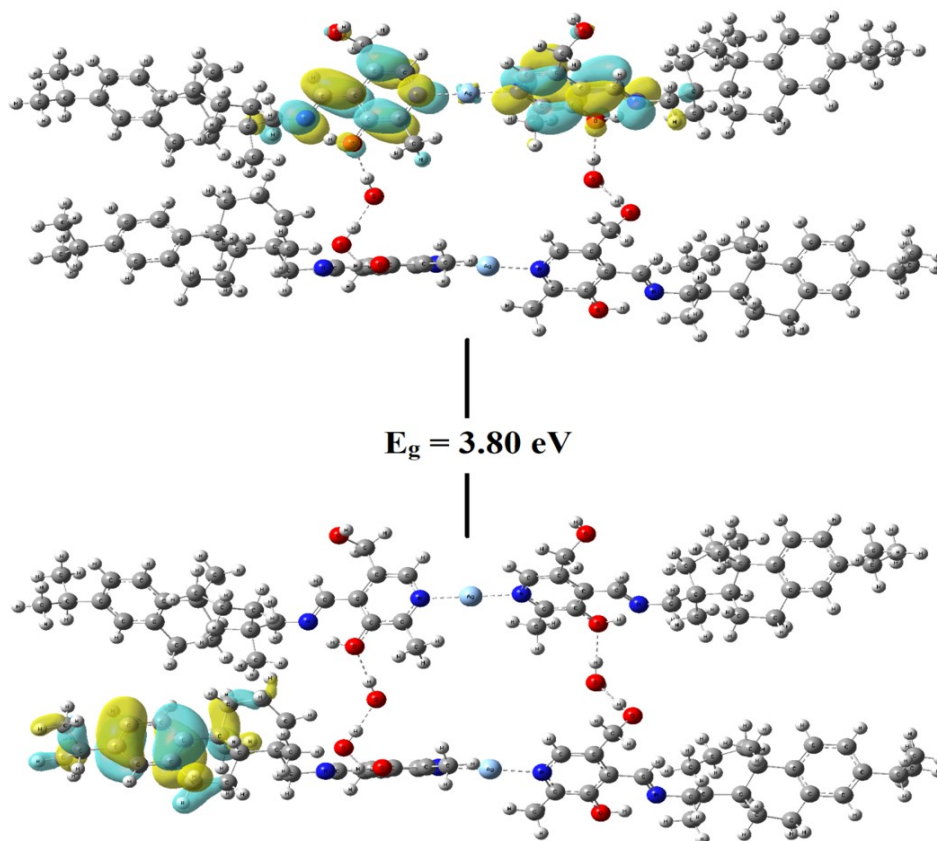

**Figure S13.** HOMO-LUMO plot of tetramer of compound **1** with two silver ion.

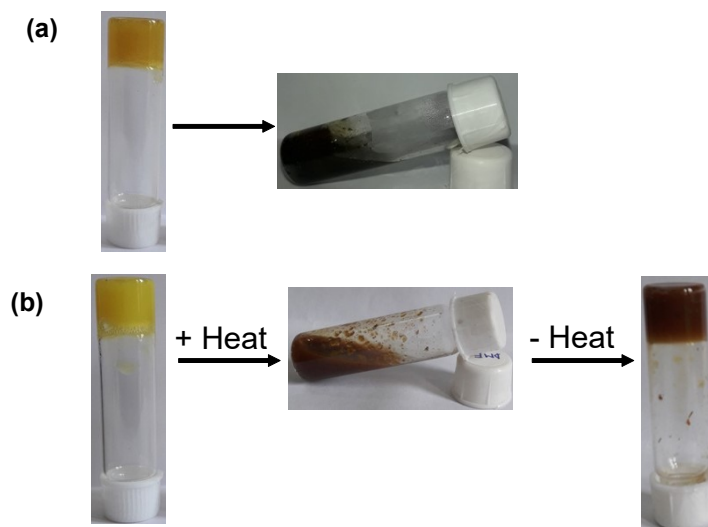

**Figure S14.** Temperature induced gel to sol transition of compound **1** in presence of  $\text{Ag}^+$  in (a) DMF/ $\text{H}_2\text{O}$  and in (b) DMSO/ $\text{H}_2\text{O}$  system.

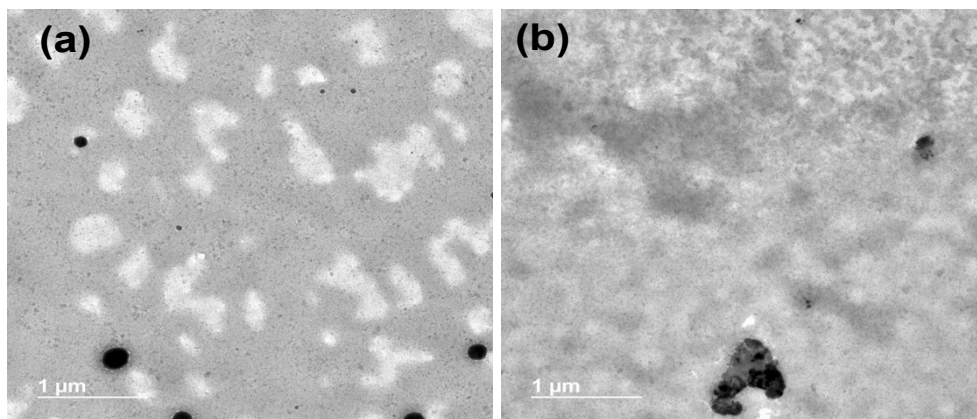

**Figure S15.** Transmission electron microscopy (TEM) images of xerogel of compound **1** prepared in DMSO/H<sub>2</sub>O (1:1, v/v) in presence of 2 equivalent amounts of Ag<sup>+</sup> ion.

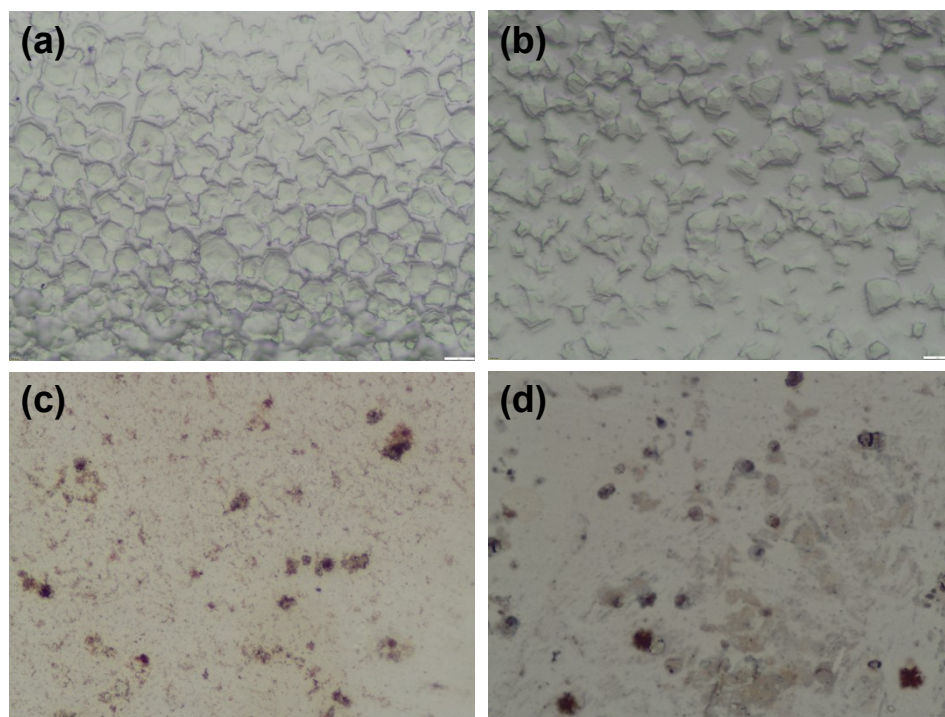

**Figure S16.** Optical image of solution of compound **1** prepared in (a) DMF (b) DMF-H<sub>2</sub>O (v/v, 1/1) (c) DMF-H<sub>2</sub>O in presence of 1 equiv. of Ag<sup>+</sup> and (d) DMF-H<sub>2</sub>O in presence of 2 equivalent amount of Ag<sup>+</sup> ion.

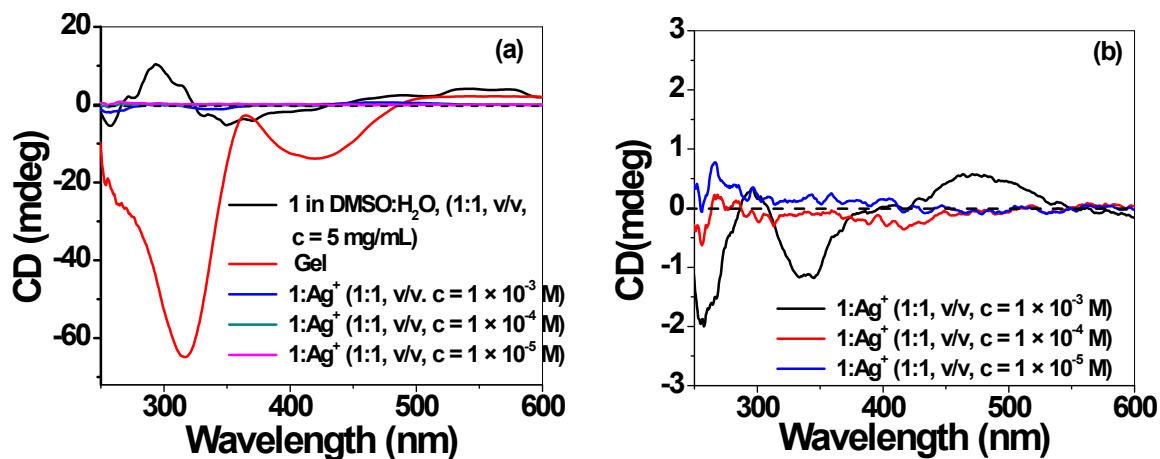

**Figure S17.** CD spectra of compound **1**: (a) at different concentrations of compound **1** (5 mg/mL) in DMSO:H<sub>2</sub>O (1:1,v/v) in absence of Ag<sup>+</sup> ion, gel and in presence of Ag<sup>+</sup> ion with decreasing concentration from 1×10<sup>-3</sup> to 1×10<sup>-5</sup> M and (b) Expanded CD spectra of the same in small scale of Y-axis.

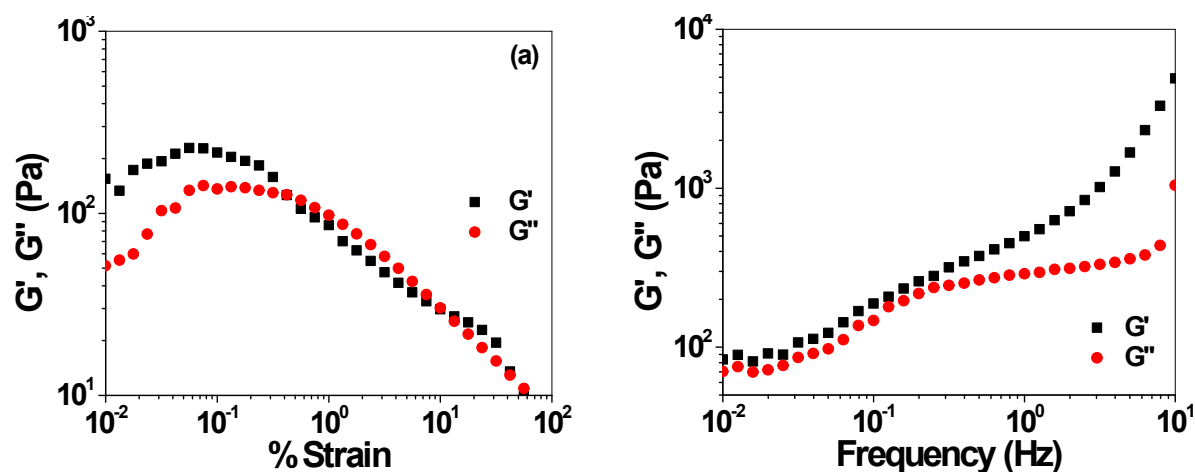

**Figure S18.** Rheological behaviour of supramolecular gel of **1** in presence of silver acetate (AgOAc): (a) Storage modulus  $G'$  and loss modulus  $G''$  of gel on strain sweep prepared in DMSO/H<sub>2</sub>O (1:1, v/v), and (b) storage modulus  $G'$  versus frequency sweep (strain: 0.1 %) of gel in DMSO/H<sub>2</sub>O (1:1, v/v).

**Table S2.** Rheology data for Ag(OAc) gel

| Solvent system (1:1, v/v) | Critical strain (%) | Crossover (% strain) | $G'_{av}$ (Pa) | $G''_{av}$ (Pa) | Tan $\delta$ ( $G''_{av}/G'_{av}$ ) |
|---------------------------|---------------------|----------------------|----------------|-----------------|-------------------------------------|
| DMSO-H <sub>2</sub> O     | 0.13                | 0.45                 | 112            | 91              | 0.74                                |

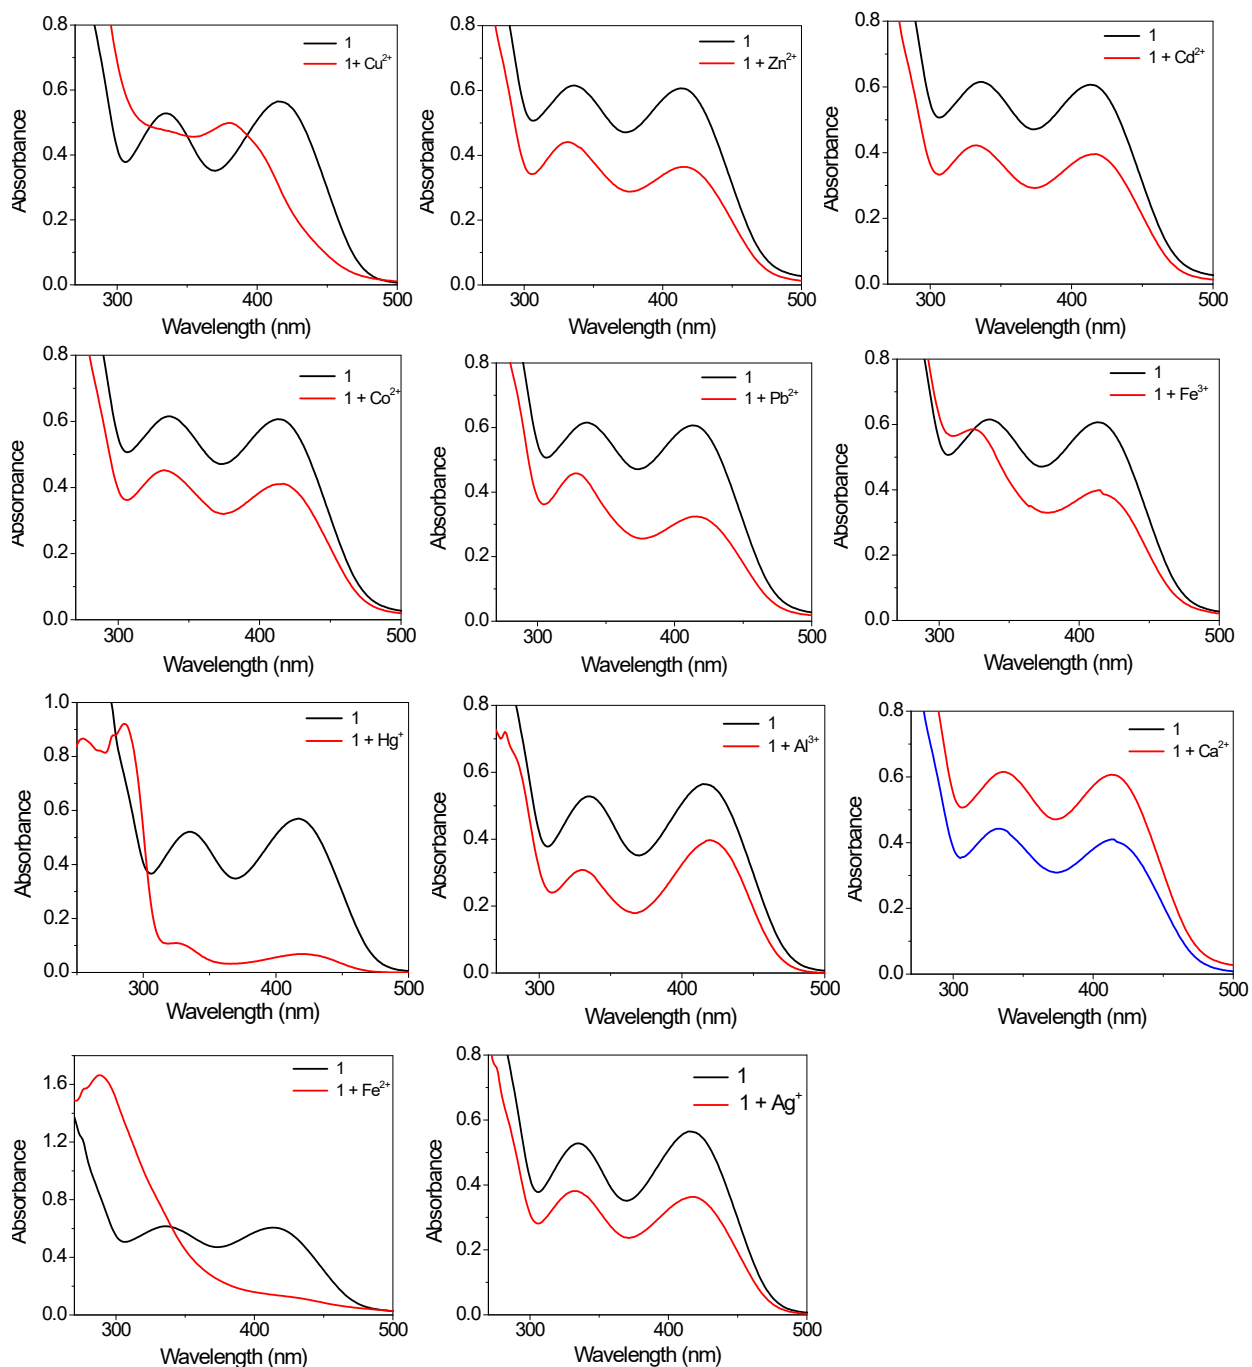

**Figure S19.** Change in absorption spectra of compound **1** ( $c = 2.5 \times 10^{-4}$  M) in presence of 3 equivalent of (a)  $\text{Cu}^{2+}$ , (b)  $\text{Zn}^{2+}$ , (c)  $\text{Cd}^{2+}$ , (d)  $\text{Ni}^{2+}$ , (e)  $\text{Co}^{2+}$ , (f)  $\text{Pb}^{2+}$ , (g)  $\text{Fe}^{3+}$ , (h)  $\text{Hg}^{2+}$ , (i)  $\text{Al}^{3+}$ , (j)  $\text{Ca}^{2+}$ , (k)  $\text{Fe}^{2+}$ , (l)  $\text{Ag}^{+}$  metal ions ( $c = 1 \times 10^{-3}$  M) in DMSO/ $\text{H}_2\text{O}$  (v/v, 1/1).

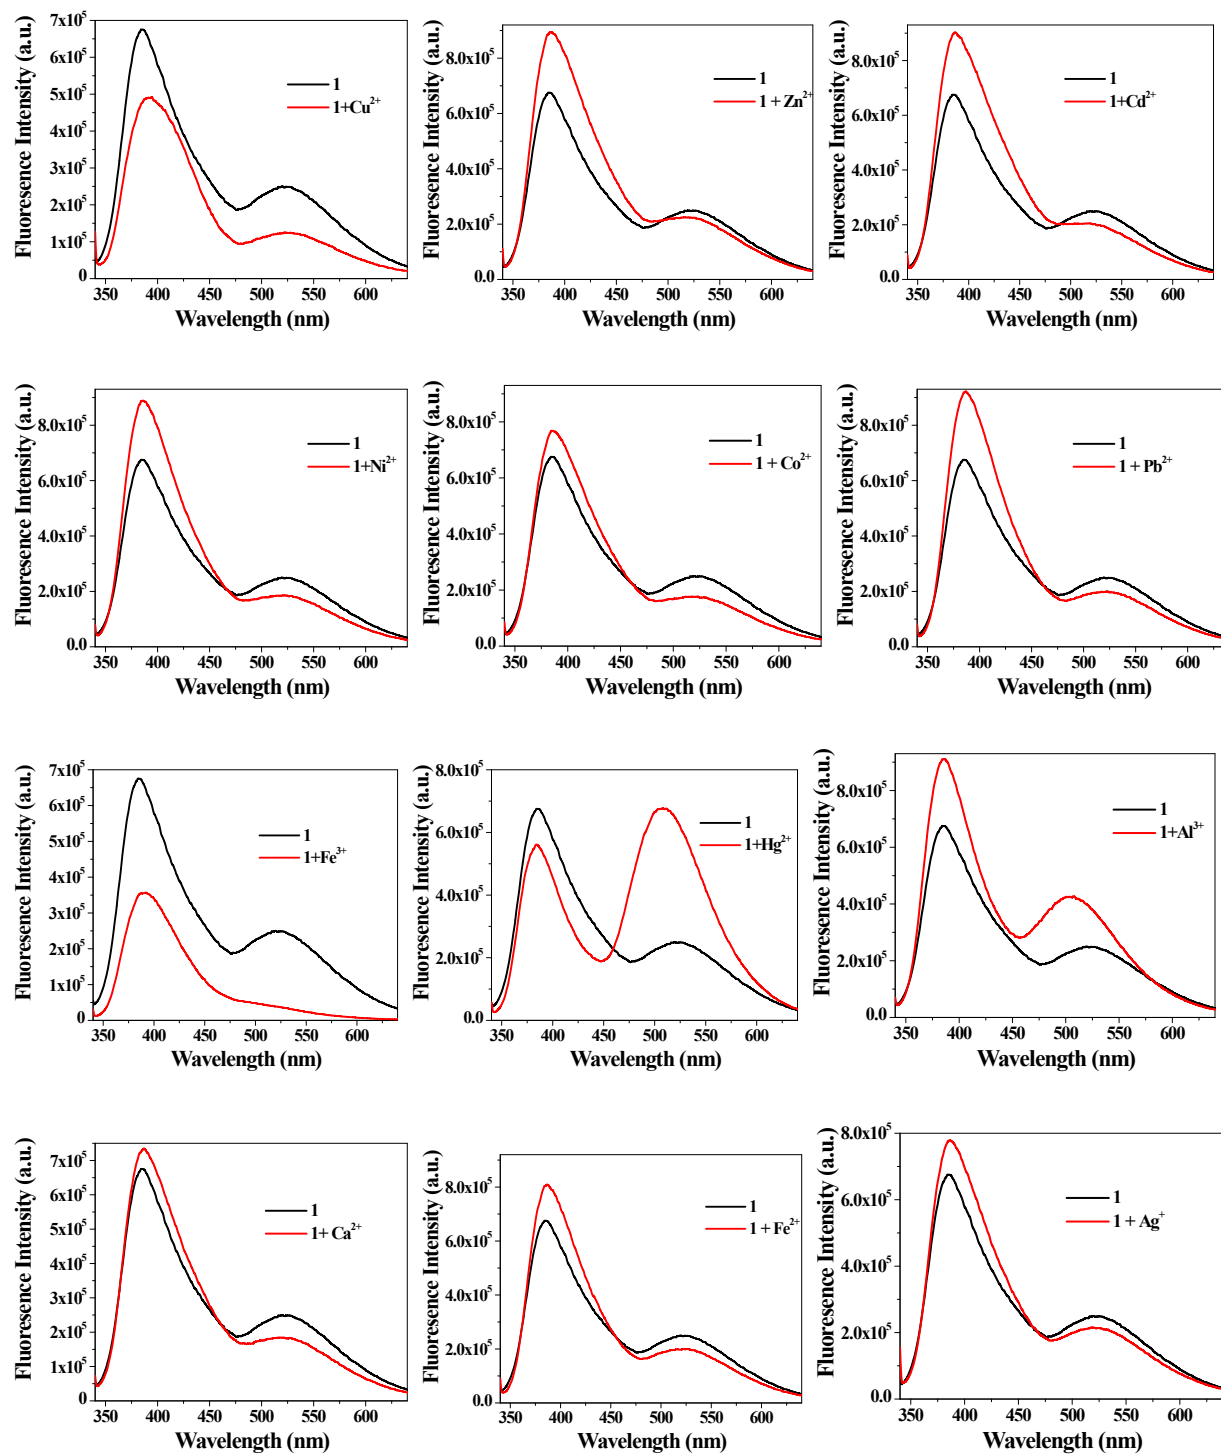

**Figure S20.** Change in emission spectra of compound **1** ( $c = 2.5 \times 10^{-4}$  M) in presence of 3 equivalent of (a)  $\text{Cu}^{2+}$ , (b)  $\text{Zn}^{2+}$ , (c)  $\text{Cd}^{2+}$ , (d)  $\text{Ni}^{2+}$ , (e)  $\text{Co}^{2+}$ , (f)  $\text{Pb}^{2+}$ , (g)  $\text{Fe}^{3+}$ , (h)  $\text{Hg}^{2+}$ , (i)  $\text{Al}^{3+}$ , (j)  $\text{Ca}^{2+}$ , (k)  $\text{Fe}^{2+}$ , (l)  $\text{Ag}^+$  metal ions ( $c = 1 \times 10^{-3}$  M) in DMSO/ $\text{H}_2\text{O}$  (v/v, 1/1).

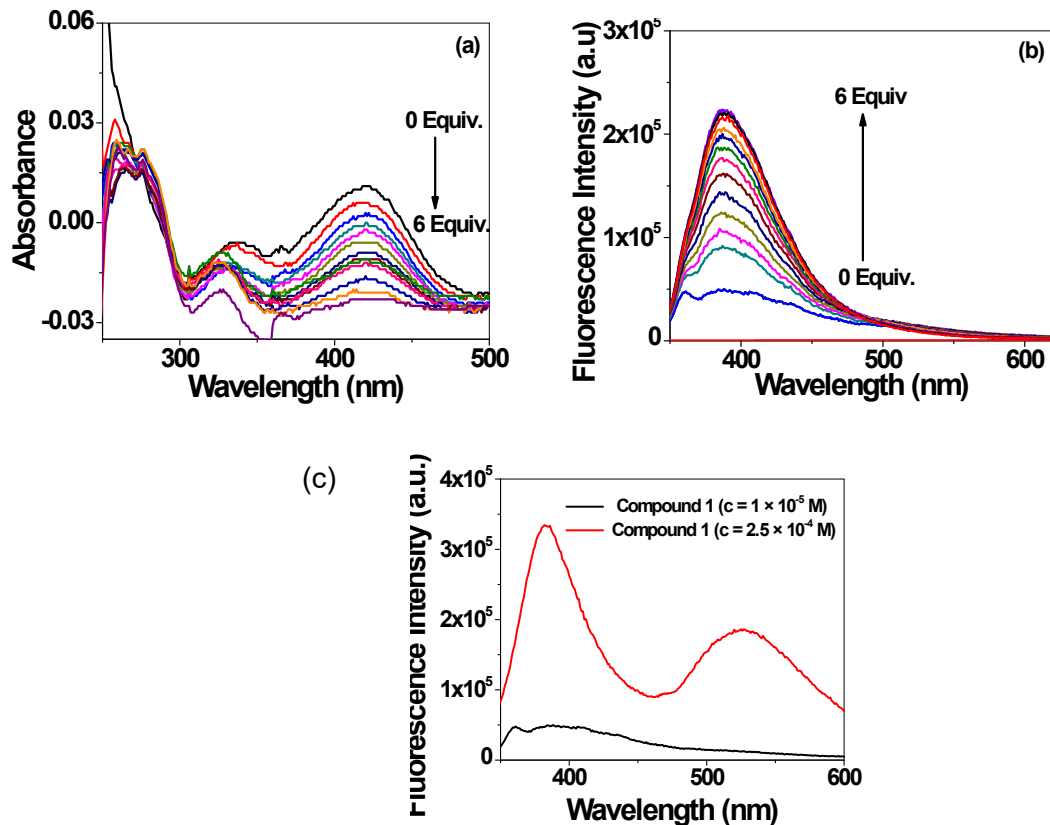

**Figure S21.** (a) Absorption, (b) emission titration spectra of compound **1** in DMSO/ $\text{H}_2\text{O}$  (1:1, v/v) ( $c = 1 \times 10^{-5} \text{ M}$ ) in presence of  $\text{Hg}^{2+}$  ion ( $c = 1 \times 10^{-3} \text{ M}$ ) ( $\text{Hg}^{2+}$  is taken as  $\text{HgClO}_4$ ), and (c) Fluorescence spectra of compound **1** in different concentrations.

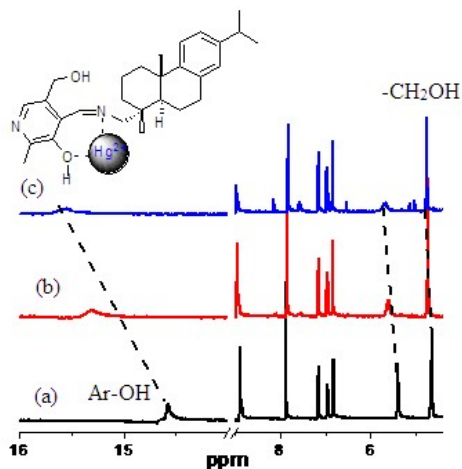

**Figure S22.** Partial  $^1\text{H}$  NMR spectra of receptor **1** ( $c = 2.5 \times 10^{-3} \text{ M}$ ) (a) in absence and in presence of (b) 1 equiv. and (c) 2 equiv. of  $\text{Hg}^{2+}$  ion in  $d_6$ -DMSO.

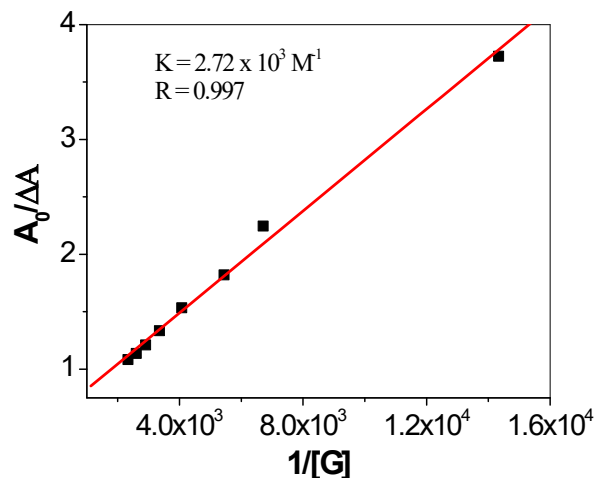

**Figure S23.** UV-Vis Benesi-Hildebrand plot for **1** ( $c = 2.5 \times 10^{-4} \text{ M}$ ) with  $\text{Hg}^{2+}$  ( $c = 1 \times 10^{-3} \text{ M}$ ) at 420 nm.

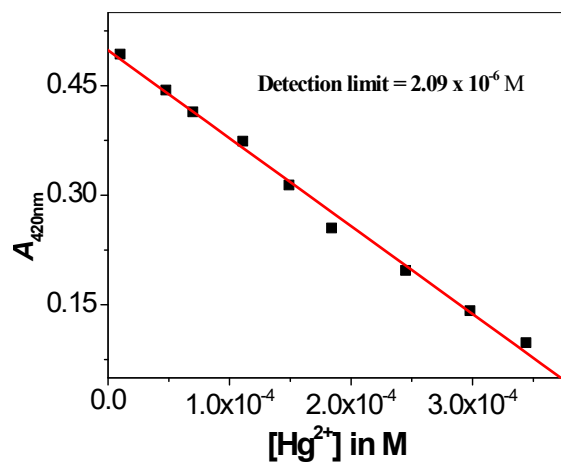

**Figure S24.** Detection limit for receptor **1** ( $c = 2.5 \times 10^{-4} \text{ M}$ ) with  $\text{Hg}^{2+}$  ( $c = 1 \times 10^{-3} \text{ M}$ ) at 420 nm.

**Table S3.** List of different Ag<sup>+</sup> ion responsive supramolecular gelators

| Entry | Structure                                                                           | Solvent                                                   | Phase transformation in presence of Ag <sup>+</sup> ions | Interfering metal ions | Detection limit for Ag <sup>+</sup> (M) | Ref.                                              |
|-------|-------------------------------------------------------------------------------------|-----------------------------------------------------------|----------------------------------------------------------|------------------------|-----------------------------------------|---------------------------------------------------|
| 1     | 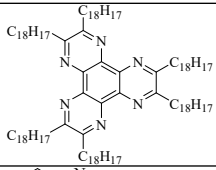   | EtOH                                                      | Gel to sol                                               | -                      | -                                       | <i>Tetrahedron Lett.</i> 2012, <b>53</b> , 1840.  |
| 2     |    | MeOH                                                      | Sol to gel                                               | -                      | -                                       | <i>Chem. Commun.</i> 2013, <b>49</b> , 4181.      |
| 3     |    | MeOH:H <sub>2</sub> O (1:1, v/v)                          | Sol to gel                                               | -                      | -                                       | <i>Supramol. Chem.</i> 2014, <b>26</b> , 39.      |
| 4     |    | THF/ H <sub>2</sub> O                                     | Sol to gel                                               | -                      | -                                       | <i>Soft Matter</i> , 2011, <b>7</b> , 2412.       |
| 5     |  | H <sub>2</sub> O                                          | Sol to gel                                               | -                      | -                                       | <i>Soft Matter</i> , 2012, <b>8</b> , 6557.       |
| 6     |  | DMF: H <sub>2</sub> O (2:3, v/v)                          | Sol to gel                                               | -                      | -                                       | <i>Cryst. Growth Des.</i> 2015, <b>15</b> , 4635. |
| 7     |  | CH <sub>2</sub> Cl <sub>2</sub> , CHCl <sub>3</sub> , THF | Sol to gel                                               | -                      | -                                       | <i>Langmuir</i> , 2012, <b>28</b> , 27.           |
| 8     |  | Toluene: EtOH (99:1, v/v)                                 | Sol to gel                                               | -                      | -                                       | <i>Chem. Commun.</i> 2015, <b>51</b> , 13929.     |
| 9     |  | DMF, DMF/ H <sub>2</sub> O, DMSO/ H <sub>2</sub> O        | Sol to gel                                               | -                      | -                                       | <i>Cryst. Growth Des.</i> 2015, <b>15</b> , 5360. |



|    |                                                                                                                                                                                                                                                                                                                |                                                     |            |                                     |                         |                                                |
|----|----------------------------------------------------------------------------------------------------------------------------------------------------------------------------------------------------------------------------------------------------------------------------------------------------------------|-----------------------------------------------------|------------|-------------------------------------|-------------------------|------------------------------------------------|
| 10 | 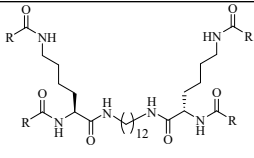 <p>R = <math>C_7H_{15}</math>  <math>C_7H_{15}</math> </p> | EtOAc                                               | Gel to sol | Li <sup>+</sup>                     | -                       | <i>Chem. Commun.</i> 2012, <b>48</b> , 2767.   |
| 11 |  <p>R = </p>                                                                                                                                 | DMF : H <sub>2</sub> O<br>(1:1, v/v)                | Sol to gel | -                                   | 4.31 x 10 <sup>-5</sup> | <i>ChemistrySelect</i> , 2017, <b>2</b> , 959. |
| 12 |  <p>a. X = Y = CH; Z = N<br/>b. X = Z = CH; Y = N<br/>c. Y = Z = CH; X = N</p>                                                                                                                                                | DMSO: H <sub>2</sub> O                              | Sol to gel | -                                   | -                       | <i>Dalton Trans.</i> , 2017, <b>46</b> , 2793. |
| 13 |  <p>OC<sub>16</sub>H<sub>33</sub><br/>OC<sub>16</sub>H<sub>33</sub><br/>OC<sub>16</sub>H<sub>33</sub></p>                                                                                                                     | Toluene/ethanol<br>(10:1, v/v)                      | Sol to gel | -                                   | -                       | <i>Langmuir</i> , 2007, <b>23</b> , 8217.      |
| 14 |  <p>R = </p>                                                                                                                                 | Diphenyl ether                                      | Sol to gel | -                                   | -                       | <i>Chem. Lett.</i> , 2003, <b>32</b> , 12.     |
| 15 |                                                                                                                                                                                                                              | THF-H <sub>2</sub> O (3 : 2)                        | Sol to gel | -                                   | -                       | <i>New J. Chem.</i> , 2010, <b>34</b> , 2261.  |
| 16 |                                                                                                                                                                                                                             | H <sub>2</sub> O                                    | Sol to gel | -                                   | -                       | <i>New J. Chem.</i> , 2014, <b>38</b> , 2470.  |
| 17 |  <p>R = </p>                                                                                                                             | CHCl <sub>3</sub> :CH <sub>3</sub> OH<br>(2:1, v/v) | Gel to Sol | Cu <sup>2+</sup> , Hg <sup>2+</sup> | -                       | <i>New J. Chem.</i> , 2016, <b>40</b> , 3476.  |
| 18 |                                                                                                                                                                                                                             | DMSO: H <sub>2</sub> O<br>(1:1, v/v)                | Sol to gel | Cu <sup>2+</sup><br>-               | -<br>-                  | <i>New J. Chem.</i> , 2018, <b>42</b> , 6488.  |

|    |                                                                                     |                                                                                                      |                                                      |                                                                                                                                                          |                                                                                                          |                                                    |
|----|-------------------------------------------------------------------------------------|------------------------------------------------------------------------------------------------------|------------------------------------------------------|----------------------------------------------------------------------------------------------------------------------------------------------------------|----------------------------------------------------------------------------------------------------------|----------------------------------------------------|
| 19 | 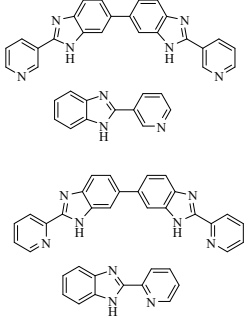   | DMSO: H <sub>2</sub> O<br>DMSO: H <sub>2</sub> O<br>DMSO: H <sub>2</sub> O<br>DMSO: H <sub>2</sub> O | Gel to sol<br>Gel to sol<br>Sol to gel<br>Sol to gel | Cu <sup>2+</sup><br>Cu <sup>2+</sup> , Hg <sup>2+</sup><br>-<br>-                                                                                        | 3.69 x 10 <sup>-6</sup><br>3.34 x 10 <sup>-6</sup><br>1.93 x 10 <sup>-7</sup><br>1.28 x 10 <sup>-6</sup> | <i>Mater. Chem. Front.</i> , 2018, <b>2</b> , 385. |
| 20 |    | 1,4-dioxane-MeOH (1:1, v/v)<br>1,4-dioxane-H <sub>2</sub> O (1:1, v/v)                               | Gel to sol<br>Sol to gel                             | -<br>-                                                                                                                                                   | 3.27 x 10 <sup>-5</sup><br>9.27 x 10 <sup>-5</sup>                                                       | <i>New J. Chem.</i> , 2019, <b>43</b> , 5139       |
| 21 |    | CHCl <sub>3</sub> /CH <sub>3</sub> OH (3:1, v/v)                                                     | Visual detection through sol-to-gel transition       | Fe <sup>3+</sup>                                                                                                                                         | 9.35 x 10 <sup>-6</sup>                                                                                  | <i>Mater. Chem. Front.</i> , 2018, <b>2</b> , 2286 |
| 22 |  | DMSO-H <sub>2</sub> O (1:2, v/v)                                                                     | Visual detection through sol-to-gel transition       | -                                                                                                                                                        | 5.95 x 10 <sup>-5</sup>                                                                                  | <i>New J. Chem.</i> , 2019, <b>43</b> , 934        |
| 23 |  | DMSO-H <sub>2</sub> O (1:1, v/v)                                                                     | Sol-to-Gel transition                                | Ag <sup>+</sup> (Different modes of interaction, Hg <sup>2+</sup> and Ag <sup>+</sup> ions are discriminated with the aid of different chelating agents) | 1.1 x 10 <sup>-6</sup>                                                                                   | <i>ChemistrySelect</i> , 2019, <b>4</b> , 11564.   |

|    |                                                                                                                                                                                                                                                                                                                  |                                                                                                                          |                                     |                   |                                                                                 |                                                              |
|----|------------------------------------------------------------------------------------------------------------------------------------------------------------------------------------------------------------------------------------------------------------------------------------------------------------------|--------------------------------------------------------------------------------------------------------------------------|-------------------------------------|-------------------|---------------------------------------------------------------------------------|--------------------------------------------------------------|
| 24 | 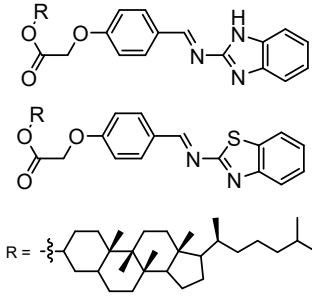 <p>R = </p>                                                                                                                                   | <p>1,4-dioxane-MeOH (1:1, v/v)</p> <p>1,4-dioxane-H<sub>2</sub>O (1:1, v/v)</p>                                          | <p>Gel to sol</p> <p>Sol to gel</p> | <p>-</p> <p>-</p> | <p><math>3.27 \times 10^{-5}</math></p> <p><math>9.27 \times 10^{-5}</math></p> | <p><i>New J. Chem.</i>, <b>2019</b>, <i>43</i>, 5139.</p>    |
| 25 |                                                                                                                                                                                                                                 | <p>Nitrobenzene</p>                                                                                                      | <p>Gel to Sol</p>                   | <p>-</p>          | <p>-</p>                                                                        | <p><i>New J. Chem.</i>, <b>2019</b>, <i>43</i>, 10509.</p>   |
| 26 |  <p>1. X = -NMe<sub>2</sub></p> <p>2. X = </p> <p>3. X = </p> | <p>DMF-H<sub>2</sub>O (1 : 1, v/v)</p>                                                                                   | <p>Sol to gel</p>                   | <p>-</p>          | <p>-</p>                                                                        | <p><i>ChemistrySelect</i>, <b>2021</b>, <i>6</i>, 11696.</p> |
| 27 |                                                                                                                                                                                                                               | <p>DMF-H<sub>2</sub>O (1 : 1, v/v)</p> <p>DMSO-H<sub>2</sub>O (1 : 1, v/v)</p> <p>Dioxan-H<sub>2</sub>O (1 : 1, v/v)</p> | <p>Sol to gel</p>                   | <p>-</p>          | <p>-</p>                                                                        | <p>Present work</p>                                          |
